# Supplementary material
Source: PubMed Central journal article supplement (PMC9925636)
Supplement: 40121_2023_758_MOESM1_ESM.pdf [file 40121_2023_758_MOESM1_ESM.pdf]

**Low levels of RSV testing among adults hospitalized for Lower Respiratory Tract Infection in the United States**

**Supplementary material**

Mark H. Rozenbaum<sup>1</sup>, Jen Judy<sup>2</sup>, Diana Tran<sup>3</sup>, Kari Yacisin<sup>4</sup>, Samantha K. Kurosky<sup>2</sup>, Elizabeth Begier<sup>5</sup>

Author affiliations:

<sup>1</sup>Pfizer bv, Capelle a/d IJssel, The Netherlands.

<sup>2</sup>Pfizer Inc, New York, NY, USA.

<sup>3</sup>EVERSANA, Burlington, Ontario, Canada.

<sup>4</sup>Pfizer Vaccines, Collegeville, PA, USA.

<sup>5</sup>Pfizer Vaccines, Ireland.

ORCID IDs:

Mark H. Rozenbaum: 0000-0001-6209-4370

Jen Judy: 0000-0002-2246-9745

Diana Tran: 0000-0002-4207-7554

Kari Yacisin: N/A

Samantha K. Kurosky: 0000-0003-2392-8111

Elizabeth Begier: 0000-0002-1287-5416

**Corresponding author:** Jen Judy, [Jennifer.Judy@pfizer.com](mailto:Jennifer.Judy@pfizer.com)

## Supplementary Material

### Appendix A List of diagnosis and billing codes

#### A.1 Table S1: LRTI Diagnosis Codes

| Value |        | Description                             |
|-------|--------|-----------------------------------------|
| J09   | J09    | INFLUNZA D/T ID INFLUNZA VIRUS          |
|       | J09.X  | FLU D/T IDENT NOVEL FLU A VIRUS         |
|       | J09.X1 | FLU D/T ID NOVEL FLU A VIRUS W PN       |
|       | J09.X2 | FLU D/T IDENT NVL FLU A VIRUS W/RES     |
|       | J09.X3 | FLU D/T IDENT NVL FLU A VIRUS W/GI      |
|       | J09.X9 | FLU D/T IDENT NVL FLU A VIRUS WOTH      |
| J10   | J10    | INFLUENZA D/T OTHR IDENT FLU VIRUS      |
|       | J10.0  | INFLU D/T OTH IDENT FLU W/PNEUMONIA     |
|       | J10.00 | FLU D/T OTH ID FLU VIRUS W UNSP TYPE PN |
|       | J10.01 | INFLU D/T OTH IDENT FLU W/SAM OT PN     |
|       | J10.08 | FLU D/T OTH ID FLU VIRUS W OTH SPEC PN  |
|       | J10.1  | INFLUENZA D/T OTHR FLU VIRUS W/RESP     |
|       | J10.2  | FLU D/T OTH ID FLU VIRUS W GI MANIFEST  |
|       | J10.8  | INFLUENZA D/T OTHR FLU WOTHR MANI       |
|       | J10.81 | FLU D/T OTH IDNTF FLU VI W/ENCEPHAP     |
|       | J10.82 | FLU D/T OTH ID FLU VIRUS W MYOCARDITIS  |
|       | J10.83 | FLU D/T OTH ID FLU VIRUS W OTITIS MEDIA |
|       | J10.89 | FLU D/T OTH ID FLU VIRUS W OTH MANIFEST |
| J11   | J11    | INFLUENZA D/T UNIDENT FLU VIRUS         |
|       | J11.0  | INFLU D/T UNIDENT FLU WTH PNEUMONIA     |
|       | J11.00 | FLU D/T UNID FLU VIRUS W UNSP TYPE PN   |
|       | J11.08 | FLU D/T UNID FLU VIRUS W SPEC PN        |
|       | J11.1  | INFLU D/T UNIDNT FLU VRS WOTH RESP      |

|            |         |                                         |
|------------|---------|-----------------------------------------|
|            | J11.2   | FLU D/T UNID FLU VIRUS W GI MANIFEST    |
|            | J11.8   | INFLU D/T UNIDNT FLU VRS WOTH MANF      |
|            | J11.81  | FLU D/T UNID FLU VIRUS W ENCEPHALOPATHY |
|            | J11.82  | FLU D/T UNID FLU VIRUS W MYOCARDITIS    |
|            | J11.83  | FLU D/T UNID FLU VIRUS W OTITIS MEDIA   |
|            | J11.89  | FLU D/T UNID FLU VIRUS W OTH MANIFEST   |
| <b>J12</b> | J12     | VIRAL PNEUMONIA, NEC                    |
|            | J12.0   | ADENOVIRAL PN                           |
|            | J12.1   | RESP SYNCYTIAL VIRUS PN                 |
|            | J12.2   | PARAINFLUENZA VIRUS PN                  |
|            | J12.3   | HUMAN METAPNEUMOVIRUS PN                |
|            | J12.8   | OTH VIRAL PNEUMONIA                     |
|            | J12.81  | PN D/T SARS-ASSOC CORONAVIRUS           |
|            | J12.82  | PN D/T CORONAVIRUS DISEASE 2019         |
|            | J12.89  | OTH VIRAL PN                            |
|            | J12.9   | VIRAL PN UNSP                           |
| <b>J13</b> | J13     | PN D/T STREPTOCOCCUS PNE                |
| <b>J14</b> | J14     | PN D/T HEMOPHILUS INFLUENZAE            |
| <b>J15</b> | J15     | BACTERIAL PNEUMONIA NEC                 |
|            | J15.0   | PN D/T KLEBSIELLA PNE                   |
|            | J15.1   | PN D/T PSEUDOMONAS                      |
|            | J15.2   | PNEUMONIA DUE TO STAPHYLOCOCCUS         |
|            | J15.20  | PN D/T STAPH UNSP                       |
|            | J15.21  | PNEUMONIA D/T STAPH AUREUS              |
|            | J15.211 | PN D/T METHCIL SUSCEPT STAPH AURS       |
|            | J15.212 | PN D/T METHCIL RESISTANT STAPH AURS     |
|            | J15.29  | PN D/T OTH STAPH                        |
|            | J15.3   | PN D/T STREPTOCOCCUS GRP B              |

|            |       |                                       |
|------------|-------|---------------------------------------|
|            | J15.4 | PN D/T OTH STREPTOCOCCI               |
|            | J15.5 | PN D/T ESCHERICHIA COLI               |
|            | J15.6 | PN D/T OTH GRAM-NEGATIVE BACTERIA     |
|            | J15.7 | PN D/T MYCOPLASMA PNE                 |
|            | J15.8 | PN D/T OTH SPEC BACTERIA              |
|            | J15.9 | UNSP BACTERIAL PN                     |
| <b>J16</b> | J16   | PNEUMONIA D/T OTH INFCT ORGANS NEC    |
|            | J16.0 | CHLAMYIAL PN                          |
|            | J16.8 | PN D/T OTH SPEC INFCT ORGISMS         |
| <b>J17</b> | J17   | PN IN DZ CLS ELSWHR                   |
| <b>J18</b> | J18   | PNEUMONIA, UNSP ORGANISM              |
|            | J18.0 | BRONCHOPN UNSP ORGISM                 |
|            | J18.1 | LOBAR PN UNSP ORGISM                  |
|            |       |                                       |
|            | J18.8 | OTH PN UNSP ORGISM                    |
|            | J18.9 | PN UNSP ORGISM                        |
| <b>J20</b> | J20   | ACUTE BRONCHITIS                      |
|            | J20.0 | AC BRONCHIT D/T MYCOPLASMA PNE        |
|            | J20.1 | AC BRONCHIT D/T HEMOPHILUS INFLUENZAE |
|            | J20.2 | AC BRONCHIT D/T STREPTOCOCCUS         |
|            | J20.3 | AC BRONCHIT D/T COXSACKIEVIRUS        |
|            | J20.4 | AC BRONCHIT D/T PARAINFLUENZA VIRUS   |
|            | J20.5 | AC BRONCHIT D/T RESP SYNCYTIAL VIRUS  |
|            | J20.6 | AC BRONCHIT D/T RHINOVIRUS            |
|            | J20.7 | AC BRONCHIT D/T ECHOVIRUS             |
|            | J20.8 | AC BRONCHIT D/T OTH SPEC ORGISMS      |
|            | J20.9 | AC BRONCHIT UNSP                      |
| <b>J21</b> | J21   | ACUTE BRONCHIOLITIS                   |

|              |       |                                       |
|--------------|-------|---------------------------------------|
|              | J21.0 | AC BRONCHIO D/T RESP SYNCYTIAL VIRUS  |
|              | J21.1 | AC BRONCHIO D/T HUMAN METAPNEUMOVIRUS |
|              | J21.8 | AC BRONCHIO D/T OTH SPEC ORGISMS      |
|              | J21.9 | AC BRONCHIO UNSP                      |
| <b>J22</b>   | J22   | UNSP AC LO RESP INFCT                 |
| <b>J44.0</b> | J44   | OTHR CHR OBSTR PULMONARY DZ           |
|              | J44.0 | CHRON OBSTR PULM DZ W/AC LO RESP      |
|              | J44.1 | CHRON OBSTR PULM DZ W/EXACERBATION    |
|              | J44.9 | CHR OBSTRUCTIVE PULM DZ UNSP          |
| <b>J85.x</b> | J85   | ABSCESS OF LUNG AND MEDIASTINUM       |
|              | J85.0 | GANGR&NECR LUNG                       |
|              | J85.1 | ABCS LUNG W PN                        |
|              | J85.2 | ABCS LUNG WO PN                       |
|              | J85.3 | ABCS MEDIASTINUM                      |
| <b>J86.x</b> | J86   | PYOTHRX                               |
|              | J86.0 | PYOTHRX W FISTULA                     |
|              | J86.9 | PYOTHRX WO FISTULA                    |

**A.2 Table S2: RSV Premier Standard Chargemaster Billing Codes**

| <b>RSV Test (billing only)</b> |                                                    |                          |
|--------------------------------|----------------------------------------------------|--------------------------|
| <b>Value</b>                   | <b>Description</b>                                 | <b>Dept</b>              |
| 970971867560000                | PF ANTIBODY RESPIRATORY SYNCYTIAL VIRUS (RSV)      | <b>PROFESSIONAL FEES</b> |
| 970971872500000                | PF CULTURE VIRUS ID RESPIRATORY SYNCYTIAL VIRUS    | <b>PROFESSIONAL FEES</b> |
| 300306876340000                | RESP VIR MULT REV TRANSCRIPT & AMP PROBE RSV AMP   | <b>LABORATORY</b>        |
| 300306872070001                | SMEAR RSV DIRECT STAIN                             | <b>LABORATORY</b>        |
| 300306878070000                | IMMUNOASSAY OPTICAL RESPIRATORY SYNCYTIAL VIRUS    | <b>LABORATORY</b>        |
| 300306872520001                | CULTURE VIR ID RESPIRATORY SYNCYTIAL VIRUS         | <b>LABORATORY</b>        |
| 980980874200000                | PF ANTIGEN EIA QL RESPIRATORY SYNCYTIAL VIRUS      | <b>PROFESSIONAL FEES</b> |
| 980980878070000                | PF IMMUNOASSAY OPTICAL RESPIRATORY SYNCYTIAL VIRUS | <b>PROFESSIONAL FEES</b> |
| 980980876340000                | PF RESP VIR MULT REV TRANSCR & AMP PROBE RSV AMP   | <b>PROFESSIONAL FEES</b> |
| 980980872800000                | PF ANTIGEN DFA RESPIRATORY SYNCYTIAL VIRUS         | <b>PROFESSIONAL FEES</b> |
| 300306872500002                | CULTURE VIRUS ID RESPIRATORY SYNCYTIAL VIRUS       | <b>LABORATORY</b>        |
| 300302867560000                | ANTIBODY RESPIRATORY SYNCYTIAL VIRUS (RSV)         | <b>LABORATORY</b>        |
| 300306872800000                | ANTIGEN DFA RESPIRATORY SYNCYTIAL VIRUS            | <b>LABORATORY</b>        |
| 300302861710002                | COMPLEMENT FIXATION RSV                            | <b>LABORATORY</b>        |
| 300302863170002                | IMMUNOASSAY QN RSV                                 | <b>LABORATORY</b>        |
| 300306874200000                | ANTIGEN EIA QL RESPIRATORY SYNCYTIAL VIRUS         | <b>LABORATORY</b>        |
| 300319024100000                | INF DIS RNA 4 TARGETS COVID19 INF A&B RSV EA PATH  | <b>LABORATORY</b>        |
| 300319876370000                | INF AGNT DET DNA/RNA AMP PROBE COVID19&INF A&B RSV | <b>LABORATORY</b>        |
| 300306876330000                | RESP VIR MULT REV TRANSCRIPT & AMP PROBE 12-25 TAR | <b>LABORATORY</b>        |
| 300306876310000                | RESP VIR MULT REV TRANSCRIPT & AMP PROBE 3-5 TARGT | <b>LABORATORY</b>        |
| 300319022500000                | INF DIS PATHOGEN-SPEC 21 TARGETS AMP PROBE COVID19 | <b>LABORATORY</b>        |
| 300319010000000                | RESPIR PTHGN MULT REV TRANS&AMP PRB TECH 21 TRGT   | <b>LABORATORY</b>        |

|                 |                                                    |                   |
|-----------------|----------------------------------------------------|-------------------|
| 300306876320000 | RESP VIR MULT REV TRANSCRIPT & AMP PROBE 6-11 TARG | <b>LABORATORY</b> |
| 300319009900000 | RESPIR PTHGN MULT REV TRANS& PRB TECH 20 TRGT      | <b>LABORATORY</b> |
| 300319020200000 | INF DIS(DNA/RNA) 22 TARGET INC/COVID19 QL NASOPHAR | <b>LABORATORY</b> |

## Appendix B Trends across time (including RSV seasons during the Covid pandemic)

We evaluated testing patterns through the 2020-21 season (inclusive) to determine whether the COVID pandemic period affected levels of RSV testing among older adult LRTI inpatients. We observed modest increase in the median percentage of RSV testing overall over time: 0.8%, 2.8%, 6.3%, 13.3%, and 9.1% for 2016/17, 2017/18, 2018/19, 2019/20, and 2020/21, respectively (Table S3). The increase observed in 2019-20 is consistent with the pattern of rising trends over time. This RSV season would only have been impacted by COVID during the final two months. Testing during the 2020-21 season decreased slightly from the prior year, except for a few outlying hospitals that showed higher levels of testing. We speculate that the frequency of RSV testing in the first full post-pandemic RSV season (2020/21) dropped due to the hospitals allocating their available resources to COVID testing and treatment over RSV testing. Although the pandemic-era RSV seasons are not the focus of this analysis, the trends we observe are consistent with our conclusion that overall RSV testing frequencies remain low.

### B.1 Table S3: Proportion of LRTI-related Hospitalizations with a Billed RSV Test, all years

|                   |                                   | Number of hospitals | Mean ( $\pm$ SD)   | Median (Range)  |
|-------------------|-----------------------------------|---------------------|--------------------|-----------------|
| <b>Total</b>      | Total Pre-Pandemic (2016-2019)    | 937                 | 12.4 ( $\pm$ 15.8) | 4.3 (0.0-69.0)  |
|                   | Total during Pandemic (2019-2021) | 832                 | 18.6 ( $\pm$ 17.4) | 14.0 (0.0-73.9) |
| <b>RSV Season</b> | 10/1/2016-4/30/2017               | 855                 | 8.7 ( $\pm$ 13.7)  | 0.8 (0.0-62.4)  |
|                   | 10/1/2017-4/30/2018               | 819                 | 12.6 ( $\pm$ 16.9) | 2.8 (0.0-72.6)  |
|                   | 10/1/2018-4/30/2019               | 847                 | 15.8 ( $\pm$ 18.5) | 6.3 (0.0-73.3)  |
|                   | 10/1/2019-4/30/2020               | 816                 | 19.4 ( $\pm$ 18.8) | 13.3 (0.0-78.4) |
|                   | 10/1/2020-4/30/2021               | 759                 | 17.6 ( $\pm$ 20.4) | 9.1 (0.0-92.7)  |

\* Note: The chi-square test was performed at the individual patient's visit-level, whereas the rest of the statistical tests were performed at the hospital-level. This is due to the same hospitals contributing to each year, resulting in non-independence.

Abbreviations: LRTI = lower respiratory tract infection; RSV = respiratory syncytial virus; SD = standard deviation.
